# Supplementary material for: Soybean Protein and Oil Variants Identified through a Forward Genetic Screen for Seed Composition
Source: MDPI journal article supplement (doi:10.3390/plants11212966), 2022-11-03
Supplement: s1 [file s1]

Supplemental Table S1. Protein and oil content of selected mutants over five growing seasons

|       | 2017        |             |    | 2018        |             |    | 2019        |             |   | 2020        |             |   | 2021        |             |   |
|-------|-------------|-------------|----|-------------|-------------|----|-------------|-------------|---|-------------|-------------|---|-------------|-------------|---|
|       | Protein     | Oil         | n  | Protein     | Oil         | n  | Protein     | Oil         | n | Protein     | Oil         | n | Protein     | Oil         | n |
| 13370 | 43.49 ± 3.0 | 18.75 ± 1.5 | 8  | 44.58 ± 2   | 19.93 ± 1   | 3  | 44.21 ± 2.3 | 18.66 ± 0.8 | 5 | 41.42 ± 2.1 | 18.55 ± 0.2 | 5 | nd          | nd          |   |
| 13410 | 44.04 ± 2.1 | 17.58 ± 1.3 | 19 | 45.82 ± 1.1 | 18.25 ± 0.8 | 7  | 47.39 ± 0.7 | 17.13 ± 0.5 | 5 | 46.26 ± 1.1 | 14.11 ± 1.8 | 5 | 48.58 ± 3.8 | 16.83 ± 2.3 | 3 |
| 13421 | 35.19 ± 2.7 | 20.96 ± 1.0 | 17 | 37.01 ± 3   | 21.28 ± 1.9 | 8  | 32.74 ± 2   | 22.55 ± 0.8 | 5 | 34.62 ± 1.4 | 19.3 ± 0.6  | 5 | 36.16 ± 2   | 22.14 ± 0.2 | 3 |
| 13453 | 44.42 ± 3.0 | 14.92 ± 1.1 | 9  | 43.91 ± 2.1 | 16.29 ± 2   | 8  | 43.83 ± 3.1 | 16.34 ± 3.5 | 5 | 45.57 ± 0.8 | 11.86 ± 1.3 | 5 | 49.58 ± 0.8 | 13.93 ± 1.2 | 3 |
| 13507 | 45.85 ± 2.3 | 17.64 ± 1.3 | 8  | 48.91 ± 1.8 | 16.63 ± 1.3 | 8  | 48.66 ± 1.8 | 15.75 ± 0.8 | 5 | 47.81 ± 2.6 | 15.38 ± 1.3 | 5 | 47.73 ± 1.9 | 17.68 ± 0.4 | 3 |
| 13511 | 46.91 ± 1.7 | 15.34 ± 2.2 | 16 | 46.67 ± 2   | 12.17 ± 2.4 | 5  | 46.91 ± 2.9 | 16.26 ± 1.8 | 5 | 45.24 ± 1.5 | 11.07 ± 2.5 | 5 | 51.27 ± 2.1 | 10.44 ± 1.1 | 3 |
| 13531 | 44.88 ± 2.6 | 17.69 ± 1.7 | 12 | 42.49 ± 1.6 | 18.4 ± 1    | 8  | 44.98 ± 1.6 | 17.01 ± 1.3 | 5 | 42.63 ± 2.2 | 17.02 ± 1.5 | 3 | 39.97 ± 3   | 21.51 ± 1.1 | 3 |
| 13543 | 39.02 ± 2.5 | 19.23 ± 2   | 24 | 40.41 ± 3.1 | 17.61 ± 1.6 | 8  | 40.06 ± 2   | 17.53 ± 0.8 | 5 | nd          | nd          |   | nd          | nd          |   |
| 13564 | 40.74 ± 2.7 | 20.03 ± 1   | 13 | 45.26 ± 2   | 18.96 ± 1.4 | 8  | 41.2 ± 2.5  | 17.46 ± 0.8 | 5 | 44.73 ± 2.3 | 19.74 ± 1.8 | 5 | nd          | nd          |   |
| 13575 | 45.33 ± 3.6 | 18.04 ± 1.8 | 9  | 47.44 ± 3   | 17.3 ± 1.9  | 5  | 46.41 ± 1.6 | 17.55 ± 0.7 | 5 | 45.53 ± 1.2 | 17.17 ± 0.7 | 5 | 47.06 ± 2.6 | 18.79 ± 1.5 | 3 |
| 14015 | nd          | nd          | 0  | 44.92 ± 1.7 | 18.82 ± 0.8 | 5  | 41.58 ± 2.3 | 20.09 ± 0.8 | 5 | 41.42 ± 2.3 | 18.16 ± 1.2 | 5 | nd          | nd          |   |
| 15130 | 49.07 ± 0   | 17.35 ± 0   | 2  | 45.25 ± 1.1 | 18.32 ± 0.6 | 8  | 46.75 ± 0.4 | 17.8 ± 0.8  | 5 | 43.59 ± 1.9 | 17.47 ± 0.8 | 5 | 44.87 ± 0.7 | 20.25 ± 0.6 | 3 |
| 15158 | 49.78 ± 0.8 | 15.45 ± 0.8 | 7  | 47.09 ± 1.6 | 17.63 ± 0.9 | 8  | 49.18 ± 1.3 | 14.88 ± 1.1 | 5 | 46.09 ± 1   | 15.67 ± 0.8 | 3 | 46.67 ± 1.4 | 18.38 ± 1.2 | 6 |
| 15201 | nd          | nd          | 0  | 44.87 ± 1.5 | 17.78 ± 1.1 | 5  | 44.93 ± 2.5 | 14.26 ± 1.8 | 5 | 44.56 ± 2.7 | 14.33 ± 1.9 | 5 | 46.96 ± 1.8 | 18.6 ± 1.2  | 3 |
| 15225 | nd          | nd          | 0  | 47.1 ± 2.6  | 17.42 ± 1.5 | 5  | 47.62 ± 1.3 | 15.97 ± 0.4 | 5 | 44.81 ± 1.6 | 15.74 ± 1.1 | 5 | 47.59 ± 2   | 17.61 ± 1.1 | 3 |
| 15251 | 41.86 ± 2.3 | 19.36 ± 0.9 | 5  | 46.94 ± 2.6 | 17.67 ± 1.4 | 8  | 44.37 ± 0.4 | 18.53 ± 0.6 | 5 | 46.23 ± 1.7 | 16.4 ± 1    | 5 | 41.65 ± 1.1 | 22.08 ± 0.5 | 3 |
| 15310 | nd          | nd          | 0  | 48.1 ± 2.4  | 17.26 ± 1.2 | 13 | 45.06 ± 1.2 | 18.93 ± 0.7 | 8 | 47.69 ± 0.9 | 13.26 ± 0.4 | 5 | 42.93 ± 1   | 20.97 ± 1.1 | 3 |
| 15327 | nd          | nd          | 0  | 47.47 ± 1.1 | 17.67 ± 1.1 | 5  | 47.86 ± 1.4 | 16.98 ± 0.6 | 8 | 43.31 ± 1.5 | 16.82 ± 1   | 5 | nd          | nd          |   |
| 15436 | nd          | nd          | 0  | 47.12 ± 1.2 | 18.53 ± 0.3 | 5  | 46.82 ± 1.3 | 17.87 ± 0.6 | 5 | 45.02 ± 1.4 | 17.03 ± 0.6 | 5 | 51.25 ± 0.6 | 16.58 ± 0.5 | 3 |
| 15439 | nd          | nd          | 0  | 37.37 ± 2.1 | 22.05 ± 1.5 | 5  | 41.22 ± 1.4 | 20.7 ± 0.8  | 5 | 39.51 ± 2.6 | 19.65 ± 1   | 5 | 37.94 ± 2.5 | 23.12 ± 0.9 | 3 |
| 15477 | 51.55 ± 1.4 | 17.81 ± 0.3 | 3  | 47.15 ± 2.5 | 17.83 ± 1.6 | 6  | 45.75 ± 1.3 | 18.2 ± 1.2  | 5 | 43.63 ± 1.2 | 17.79 ± 0.9 | 5 | nd          | nd          |   |
| 15548 | 48.88 ± 1.1 | 16.14 ± 0.6 | 5  | 44.06 ± 0.8 | 18.85 ± 0.7 | 5  | 45.84 ± 1.2 | 17.71 ± 0.7 | 5 | 44.45 ± 1.3 | 16.86 ± 1   | 5 | 43.88 ± 1.9 | 21.02 ± 0.6 | 3 |
| 15567 | 45.66 ± 1.8 | 16.99 ± 1.7 | 5  | 48.21 ± 1.7 | 15.99 ± 1.7 | 8  | 46.51 ± 1.1 | 16.67 ± 0.9 | 5 | 46.37 ± 1.9 | 15.59 ± 1.1 | 5 | 49.2 ± 1.6  | 17.69 ± 2   | 3 |
| 15906 | nd          | nd          | 0  | 44.12 ± 3   | 19.17 ± 1.2 | 5  | 44.33 ± 1.5 | 18.77 ± 0.7 | 5 | 46.02 ± 1.1 | 16.95 ± 0.3 | 5 | 43.4 ± 3    | 20.35 ± 1.5 | 3 |
| 15916 | nd          | nd          | 0  | 43.72 ± 7.1 | 18.29 ± 3.1 | 4  | 44.23 ± 1.7 | 17.74 ± 1.6 | 5 | 45.11 ± 3   | 16.64 ± 1.4 | 5 | 47.74 ± 3.2 | 19.17 ± 0.7 | 3 |
| 15984 | 48.64 ± 2   | 17.58 ± 0.6 | 3  | 47.19 ± 1.1 | 17.45 ± 1   | 8  | 46.8 ± 1.3  | 17.41 ± 0.6 | 5 | 45.53 ± 2.1 | 16.76 ± 0.5 | 5 | 46.87 ± 3.7 | 20.26 ± 0.7 | 3 |
| 16062 | 52.1 ± 1    | 15.97 ± 1   | 5  | 47.8 ± 2.4  | 17.76 ± 1.5 | 8  | 48.51 ± 2.2 | 17.85 ± 0.6 | 5 | 45.72 ± 3.9 | 16.33 ± 2.6 | 5 | 54.48 ± 0.7 | 17.27 ± 0.9 | 3 |
| 16157 | nd          | nd          | 0  | 44.27 ± 0.9 | 19.19 ± 0.6 | 5  | 45.15 ± 1.2 | 19.48 ± 0.8 | 5 | 45.59 ± 2   | 16.04 ± 1.4 | 5 | 43.33 ± 1.5 | 20.45 ± 0.4 | 3 |
| 16262 | nd          | nd          | 0  | 47.83 ± 2.6 | 18.21 ± 1.2 | 5  | 47.41 ± 1.6 | 18.23 ± 0.8 | 5 | 41.74 ± 2.7 | 18.64 ± 0.7 | 5 | nd          | nd          |   |
| 16279 | nd          | nd          | 0  | 45.24 ± 1.4 | 10.6 ± 2    | 5  | 45.78 ± 1.7 | 7.43 ± 0.7  | 5 | 44.27 ± 2.5 | 8.41 ± 1.6  | 5 | 38.94 ± 1.3 | 17.81 ± 3.4 | 3 |
| 16475 | nd          | nd          | 0  | 45.95 ± 1.5 | 17.58 ± 1.1 | 8  | 44.79 ± 2.5 | 17.71 ± 1.6 | 8 | 46.79 ± 1.4 | 15.4 ± 1.5  | 5 | 47.57 ± 0.5 | 18.96 ± 1.2 | 3 |
| 16478 | nd          | nd          | 0  | 47.08 ± 0.9 | 19.12 ± 1.8 | 3  | 47.72       | 18.21       | 1 | 47.16 ± 2.5 | 16.33 ± 1.6 | 5 | 49.62 ± 3.5 | 18.91 ± 3.2 | 3 |
| 16480 | nd          | nd          | 0  | 48.21 ± 0.8 | 15.69 ± 0.3 | 5  | 46.3 ± 2.1  | 16.64 ± 0.5 | 5 | 45.35 ± 1   | 15.16 ± 0.4 | 5 | 48.15 ± 2.2 | 16.97 ± 0.6 | 3 |
| 16879 | 47.08 ± 1.3 | 16.66 ± 1.1 | 5  | 47.44 ± 0.4 | 17.07 ± 1.1 | 2  | 47.95 ± 1.9 | 14.66 ± 1.1 | 5 | 44.9 ± 1.7  | 15.43 ± 1   | 4 | 49.15 ± 2.7 | 16.56 ± 1.2 | 3 |
| 16921 | 49.11 ± 1.4 | 15.01 ± 1.4 | 2  | 45.89 ± 7.7 | 18.86 ± 3.9 | 7  | 50.43       | 13.66       | 2 | 48.68 ± 1.4 | 13.61 ± 1.1 | 5 | 54.44 ± 0.5 | 18.25 ± 0.9 | 3 |
| 17238 | nd          | nd          | 0  | 33.72 ± 2.5 | 22.44 ± 0.8 | 5  | 31.24 ± 2.4 | 23.78 ± 1   | 9 | 32.91 ± 1.1 | 20.54 ± 0.5 | 5 | 35.5 ± 2.9  | 22.21 ± 0.4 | 3 |
| 18663 | nd          | nd          | 0  | 49.46 ± 0.6 | 15.13 ± 0.5 | 3  | 46.44 ± 1.5 | 16.16 ± 1   | 5 | 45.49 ± 1.8 | 14.35 ± 1.3 | 5 | 46.19 ± 0.5 | 19.02 ± 0.5 | 3 |
| 18734 | nd          | nd          | 0  | 48.06 ± 1.4 | 16.3 ± 0.5  | 5  | 51.53 ± 2.2 | 15.3 ± 0.5  | 5 | 48.9 ± 0.4  | 13.39 ± 0.7 | 5 | 48.68 ± 0.6 | 16.73 ± 0.8 | 3 |
| 18828 | nd          | nd          | 0  | 46.08 ± 1.7 | 16.56 ± 1.3 | 5  | 44.94 ± 1.9 | 16.82 ± 0.8 | 5 | 45.61 ± 1.3 | 15.11 ± 1.7 | 5 | 49.78 ± 0.6 | 17.2 ± 0.2  | 3 |
| 18940 | nd          | nd          | 0  | 46.82 ± 1.1 | 14.61 ± 1.3 | 5  | 42.19 ± 2   | 19.45 ± 0.8 | 5 | 42.09 ± 1.4 | 18.77 ± 1   | 5 | nd          | nd          |   |
| 18974 | nd          | nd          | 0  | 35.76 ± 2.7 | 23.21 ± 1   | 5  | 35.67 ± 2.7 | 22.54 ± 0.8 | 5 | 36.35 ± 2   | 20.6 ± 1.7  | 5 | 39.46 ± 4.4 | 22.57 ± 2.2 | 3 |
| 21401 | 45.87 ± 0.5 | 18.16 ± 0.8 | 5  | 48.45 ± 2.7 | 17.92 ± 1   | 8  | 50.85 ± 1.1 | 16.53 ± 0.7 | 5 | 46.38 ± 1.3 | 15.76 ± 0.8 | 5 | 51.54 ± 1.6 | 16.94 ± 0.9 | 3 |
| 21406 | nd          | nd          | 0  | 48.32 ± 1.6 | 16.24 ± 1.3 | 8  | 47.48 ± 1.2 | 17.34 ± 1   | 5 | 48.17 ± 1.9 | 14.46 ± 0.4 | 4 | 46.74 ± 1.8 | 17.17 ± 1.1 | 3 |
| 21424 | nd          | nd          | 0  | 43.35 ± 1.9 | 18.57 ± 0.9 | 8  | 42.98 ± 1.8 | 19.66 ± 0.9 | 5 | 46.33 ± 1.6 | 15.17 ± 1.1 | 5 | 42.26 ± 0.2 | 20.25 ± 0.8 | 3 |

|       |                          |                          |   |                          |                          |   |                          |                          |   |                          |                          |   |                          |                          |   |
|-------|--------------------------|--------------------------|---|--------------------------|--------------------------|---|--------------------------|--------------------------|---|--------------------------|--------------------------|---|--------------------------|--------------------------|---|
| 21430 | nd                       | nd                       | 0 | 44.95 ± 2.1 <sup>-</sup> | 20.01 ± 0.7              | 8 | 46.56 ± 0.6 <sup>-</sup> | 18.95 ± 0.8              | 5 | 45.53 ± 2.6 <sup>-</sup> | 16.39 ± 1.5 <sup>-</sup> | 5 | 46.21 ± 2.5              | 19.73 ± 1.8              | 3 |
| 21436 | nd                       | nd                       | 0 | 45.07 ± 1.7 <sup>-</sup> | 17.76 ± 0.4 <sup>-</sup> | 8 | 47.61 ± 1 <sup>-</sup>   | 17.48 ± 0.5 <sup>-</sup> | 5 | 47.01 ± 0.9 <sup>-</sup> | 14.62 ± 0.6 <sup>-</sup> | 5 | 44.57 ± 1.9              | 18.4 ± 1.2 <sup>-</sup>  | 3 |
| 21471 | 45.59 ± 0.8 <sup>-</sup> | 19.29 ± 0.5 <sup>-</sup> | 4 | 42.37 ± 2.6              | 18 ± 1.2 <sup>-</sup>    | 8 | 43.47 ± 2                | 18.98 ± 0.5              | 5 | nd                       | nd                       |   | nd                       | nd                       |   |
| 21474 | 44.65 ± 2.3              | 18.73 ± 0.7 <sup>-</sup> | 5 | 46.41 ± 1.8 <sup>-</sup> | 16.92 ± 0.6 <sup>-</sup> | 8 | 48.75 ± 3.1 <sup>-</sup> | 15.87 ± 1.5 <sup>-</sup> | 5 | 44.8 ± 1.8 <sup>-</sup>  | 16.58 ± 0.6 <sup>-</sup> | 5 | 47.65 ± 4.6              | 17.5 ± 1.8 <sup>-</sup>  | 3 |
| 21496 | nd                       | nd                       | 0 | 45.61 ± 1.5 <sup>-</sup> | 17.76 ± 1 <sup>-</sup>   | 8 | 46.38 ± 1.9              | 16.67 ± 1.2 <sup>-</sup> | 5 | 45.16 ± 0.9              | 16.93 ± 0.5 <sup>-</sup> | 5 | 45.04 ± 0.9              | 19.9 ± 0.7               | 3 |
| 21498 | nd                       | nd                       | 0 | 44.54 ± 1 <sup>-</sup>   | 18.69 ± 0.9 <sup>-</sup> | 8 | 45.63 ± 1.4              | 17.63 ± 1 <sup>-</sup>   | 5 | 44.49 ± 1.2              | 16.75 ± 1 <sup>-</sup>   | 5 | 46.73 ± 3.7              | 18.73 ± 0.5              | 3 |
| 21502 | nd                       | nd                       | 0 | 46.67 ± 1.7 <sup>-</sup> | 17.38 ± 7.6 <sup>-</sup> | 5 | 44.79 ± 1.9              | 18.67 ± 0.7              | 5 | 45.15 ± 1.2 <sup>-</sup> | 16.66 ± 0.7 <sup>-</sup> | 5 | 44.91 ± 1.8              | 18.87 ± 1                | 3 |
| 21503 | nd                       | nd                       | 0 | 45.63 ± 1.7 <sup>-</sup> | 18.39 ± 0.9 <sup>-</sup> | 8 | 46.65 ± 0.7 <sup>-</sup> | 17.94 ± 0.3              | 5 | 45.48 ± 1.7 <sup>-</sup> | 16.89 ± 0.8              | 5 | 45.52 ± 2 <sup>-</sup>   | 18.51 ± 0.8              | 3 |
| 21509 | nd                       | nd                       | 0 | 44.3 ± 2.4               | 18.96 ± 1.3 <sup>-</sup> | 8 | 40.43 ± 3.2              | 20.21 ± 1.3 <sup>-</sup> | 5 | 39.51 ± 1.4              | 18.75 ± 1                | 5 | nd                       | nd                       |   |
| 21527 | nd                       | nd                       | 0 | 45.76 ± 2.3              | 21.3 ± 3                 | 3 | 47.69 ± 1.4 <sup>-</sup> | 17.56 ± 0.9 <sup>-</sup> | 5 | 48.49 ± 1.7 <sup>-</sup> | 15.89 ± 1.2 <sup>-</sup> | 5 | 50.82 ± 0.9 <sup>-</sup> | 17.97 ± 0.8              | 3 |
| 21541 | nd                       | nd                       | 0 | 44.95 ± 3.4              | 20.66 ± 1.8              | 8 | 43.46 ± 3.7 <sup>-</sup> | 18.32 ± 1.5 <sup>-</sup> | 3 | 43.47 ± 1.5              | 16.08 ± 1.3 <sup>-</sup> | 5 | nd                       | nd                       |   |
| 21562 | nd                       | nd                       | 0 | 42.32 ± 3.4              | 19.33 ± 1.5 <sup>-</sup> | 8 | 45.52 ± 1.9              | 17.88 ± 1.6 <sup>-</sup> | 5 | 45.96 ± 3.1 <sup>-</sup> | 14.39 ± 0.9 <sup>-</sup> | 5 | 47.84                    | 16.90                    | 2 |
| 21572 | nd                       | nd                       | 0 | 44.35 ± 1.4              | 20.54 ± 0.7              | 7 | 43.6 ± 1.9               | 18.61 ± 2.5              | 5 | nd                       | nd                       |   | 41.72 ± 2.5              | 20.96 ± 1                | 3 |
| 21593 | nd                       | nd                       | 0 | 46.99 ± 2 <sup>-</sup>   | 17.99 ± 1.1 <sup>-</sup> | 6 | 46.5 ± 1.9 <sup>-</sup>  | 17.43 ± 0.5 <sup>-</sup> | 5 | 48.02 ± 1.6 <sup>-</sup> | 14.65 ± 0.8 <sup>-</sup> | 5 | 43.8 ± 3.6               | 19.88 ± 1.2              | 3 |
| 21595 | nd                       | nd                       | 0 | 50.23 ± 1.4 <sup>-</sup> | 17.45 ± 1.3 <sup>-</sup> | 5 | 47.39 ± 2.6 <sup>-</sup> | 17.91 ± 1.6              | 5 | 47 ± 1.9 <sup>-</sup>    | 15.96 ± 2 <sup>-</sup>   | 5 | 48.87 ± 2.2              | 18.27 ± 1.2              | 3 |
| 21612 | 49.53 ± 2.7 <sup>-</sup> | 15.73 ± 2.2              | 5 | 50.19 ± 1.1 <sup>-</sup> | 16.9 ± 1 <sup>-</sup>    | 8 | 51.31 ± 1.3 <sup>-</sup> | 15.3 ± 1.2 <sup>-</sup>  | 5 | 45.40                    | 13.23                    | 2 | 47.56 ± 1.9              | 19 ± 1.5                 | 3 |
| 21637 | nd                       | nd                       | 0 | 46.44 ± 1.3 <sup>-</sup> | 16.45 ± 0.9 <sup>-</sup> | 2 | 45.6 ± 1.3 <sup>-</sup>  | 16.75 ± 1.3 <sup>-</sup> | 5 | 44.61 ± 1.7 <sup>-</sup> | 13.89 ± 0.7 <sup>-</sup> | 5 | 47.92 ± 1.1 <sup>-</sup> | 18.55 ± 1.2 <sup>-</sup> | 3 |
| 21683 | 48.4 ± 1.5 <sup>-</sup>  | 13.39 ± 1.5 <sup>-</sup> | 5 | 47.28 ± 1.5 <sup>-</sup> | 12.2 ± 1.3 <sup>-</sup>  | 8 | 49.39 ± 2.6 <sup>-</sup> | 9.75 ± 0.6 <sup>-</sup>  | 5 | 46.58 ± 1.3 <sup>-</sup> | 9.13 ± 5 <sup>-</sup>    | 5 | 45 ± 1.6                 | 12.4 ± 0.3 <sup>-</sup>  | 3 |
| 21691 | nd                       | nd                       | 0 | 43.77 ± 1.5              | 19.37 ± 0.9 <sup>-</sup> | 6 | 47.39 ± 2.7 <sup>-</sup> | 17.92 ± 2.1 <sup>-</sup> | 5 | 46.86 ± 1.9 <sup>-</sup> | 15.4 ± 1.8 <sup>-</sup>  | 5 | 48.53 ± 1.5 <sup>-</sup> | 17.87 ± 1 <sup>-</sup>   | 3 |
| 21693 | nd                       | nd                       | 0 | 44.95 ± 2.5              | 19.86 ± 1.2              | 8 | 44.11 ± 0.8              | 18.99 ± 0.2              | 5 | 41.19 ± 2.1              | 18.07 ± 0.8              | 5 | nd                       | nd                       |   |
| 21697 | nd                       | nd                       | 0 | 45 ± 0.7                 | 18.55 ± 0.6 <sup>-</sup> | 5 | 45.98 ± 1.7 <sup>-</sup> | 17.52 ± 1.4 <sup>-</sup> | 5 | 44.54 ± 0.7 <sup>-</sup> | 16.55 ± 0.7 <sup>-</sup> | 5 | 43.89 ± 1.6              | 18.72 ± 0.7 <sup>-</sup> | 3 |
| 21715 | 40.75 ± 1.5              | 17.83 ± 0.7 <sup>-</sup> | 2 | 39.34 ± 1.6              | 15.73 ± 4.2              | 6 | 43.61                    | 6.22                     | 2 | 42.02                    | 3.55                     | 1 | 42.01 ± 1.9              | 13.66 ± 3.3              | 3 |
| 21729 | nd                       | nd                       | 0 | 47.15 ± 2 <sup>-</sup>   | 17.97 ± 0.7 <sup>-</sup> | 8 | 45.24 ± 2.6 <sup>-</sup> | 18.72 ± 1.2              | 5 | 45.61 ± 1 <sup>-</sup>   | 16.17 ± 0.9 <sup>-</sup> | 5 | 46.82 ± 3.7              | 18.11 ± 2.1 <sup>-</sup> | 3 |
| 21768 | nd                       | nd                       | 0 | 45.99 ± 2.1 <sup>-</sup> | 19.52 ± 1.2              | 6 | 46.58 ± 1 <sup>-</sup>   | 18.07 ± 0.8              | 5 | 50.93 ± 1.2 <sup>-</sup> | 13.58 ± 0.9 <sup>-</sup> | 5 | 51.56 ± 1.4 <sup>-</sup> | 16.83 ± 1.6              | 3 |
| 21775 | nd                       | nd                       | 0 | 47.33 ± 2 <sup>-</sup>   | 17.79 ± 1 <sup>-</sup>   | 7 | 46.31 ± 1.3 <sup>-</sup> | 17.25 ± 0.4 <sup>-</sup> | 5 | 45.57 ± 2.4 <sup>-</sup> | 15.51 ± 1.3 <sup>-</sup> | 5 | 49.53 ± 1.7 <sup>-</sup> | 15.55 ± 1.6 <sup>-</sup> | 3 |
| 21780 | nd                       | nd                       | 0 | 46.82 ± 1.4 <sup>-</sup> | 17.53 ± 1.4 <sup>-</sup> | 8 | 47.43 ± 1.4 <sup>-</sup> | 17.48 ± 0.5 <sup>-</sup> | 5 | 43.81 ± 1.8              | 16.95 ± 0.7 <sup>-</sup> | 5 | 43.78 ± 3.1              | 19 ± 0.2                 | 3 |
| 21792 | nd                       | nd                       | 0 | 45.58 ± 4.2              | 18.6 ± 2.1 <sup>-</sup>  | 5 | 45.13 ± 2.3 <sup>-</sup> | 18.13 ± 1.2              | 5 | 44.13 ± 0.5 <sup>-</sup> | 15.61 ± 0.6 <sup>-</sup> | 4 | 47.39 ± 1.9              | 17.64 ± 1.1 <sup>-</sup> | 3 |
| 21806 | 42.16 ± 0.8              | 19.38 ± 0.6 <sup>-</sup> | 5 | 46.43 ± 2.5 <sup>-</sup> | 17.54 ± 1.4 <sup>-</sup> | 8 | 45.31 ± 1.9              | 17.89 ± 0.6              | 5 | 42.62 ± 0.4              | 17.56 ± 0.6              | 5 | nd                       | nd                       |   |
| 21812 | nd                       | nd                       | 0 | 43.77 ± 1.5              | 19.09 ± 1.1 <sup>-</sup> | 8 | 44.3 ± 1.8               | 18.21 ± 0.7              | 5 | 43.77 ± 2.9              | 17.16 ± 1.3              | 5 | 43.68 ± 1.1              | 19.17 ± 0.7 <sup>-</sup> | 3 |
| 21831 | 50.33 ± 1.2 <sup>-</sup> | 16.28 ± 0.7 <sup>-</sup> | 5 | 50.14 ± 1.1 <sup>-</sup> | 15.69 ± 0.7 <sup>-</sup> | 8 | 49.82 ± 1.3 <sup>-</sup> | 15.64 ± 1.5 <sup>-</sup> | 5 | 47.45 ± 2.6 <sup>-</sup> | 14.99 ± 0.9 <sup>-</sup> | 5 | 48.58 ± 3                | 17.12 ± 0.5 <sup>-</sup> | 3 |
| 21855 | 35.17 ± 1.8              | 23.78 ± 1.6 <sup>-</sup> | 5 | 36.95 ± 1.8 <sup>-</sup> | 23.35 ± 1.2 <sup>-</sup> | 8 | 38.11 ± 4.2 <sup>-</sup> | 22.79 ± 1.7 <sup>-</sup> | 5 | 36.88 ± 2.8              | 20.68 ± 1.6 <sup>-</sup> | 5 | 41.68 ± 2                | 22.07 ± 0.9              | 3 |
| 21887 | nd                       | nd                       | 0 | 48.76 ± 2.1 <sup>-</sup> | 17.23 ± 0.8 <sup>-</sup> | 8 | 49.4 ± 2.6 <sup>-</sup>  | 15.81 ± 1.8 <sup>-</sup> | 5 | 49.71 ± 0.5 <sup>-</sup> | 14.96 ± 0.7 <sup>-</sup> | 5 | 51.07 ± 0.2 <sup>-</sup> | 20.42 ± 2.3              | 3 |
| 21888 | 49.58 ± 1.6 <sup>-</sup> | 16.95 ± 0.8 <sup>-</sup> | 5 | 42.15 ± 2.7              | 20.28 ± 1                | 8 | 44.73 ± 0.9              | 17.9 ± 1 <sup>-</sup>    | 5 | 42.64 ± 1.8              | 18.65 ± 1.4              | 5 | nd                       | nd                       |   |
| 21934 | nd                       | nd                       | 0 | 45.27 ± 1.9              | 18.63 ± 1.5              | 4 | 46.75 ± 2.1 <sup>-</sup> | 17.59 ± 0.6 <sup>-</sup> | 5 | 42.06 ± 1.1              | 17.35 ± 1.2              | 5 | nd                       | nd                       |   |
| 21935 | nd                       | nd                       | 0 | 43.28 ± 2.7              | 18.91 ± 2.2 <sup>-</sup> | 8 | 40.52 ± 1.5 <sup>-</sup> | 20.37 ± 0.5 <sup>-</sup> | 5 | 42.05 ± 2.3              | 17.5 ± 1.7               | 5 | nd                       | nd                       |   |
| 21971 | nd                       | nd                       | 0 | 48.53 ± 1.7 <sup>-</sup> | 16.66 ± 0.8 <sup>-</sup> | 8 | 50.13 ± 1.9 <sup>-</sup> | 15.23 ± 0.7 <sup>-</sup> | 5 | 49.56 ± 1.8 <sup>-</sup> | 13.95 ± 1.1 <sup>-</sup> | 5 | 44.17 ± 2.4              | 19.25 ± 0.9              | 3 |
| 21974 | nd                       | nd                       | 0 | 48.14 ± 2.1 <sup>-</sup> | 18.54 ± 2 <sup>-</sup>   | 8 | 50.39 ± 2.6 <sup>-</sup> | 15.95 ± 1.4 <sup>-</sup> | 5 | 48.93 ± 0.8 <sup>-</sup> | 14.81 ± 0.7 <sup>-</sup> | 5 | 52.41 ± 6.6              | 18.17 ± 1.2              | 3 |
| 21987 | nd                       | nd                       | 0 | 43.6 ± 2.5               | 19.42 ± 1.4 <sup>-</sup> | 8 | 43.35 ± 1.8              | 18.57 ± 1.1              | 5 | 43.73 ± 1.7              | 17.07 ± 0.9              | 5 | nd                       | nd                       |   |
| 22008 | nd                       | nd                       | 0 | 46.6 ± 1.9 <sup>-</sup>  | 17.47 ± 1.6 <sup>-</sup> | 5 | 47.22 ± 1.1 <sup>-</sup> | 15.69 ± 0.8 <sup>-</sup> | 5 | 46.53 ± 2.4              | 15.47 ± 1.5 <sup>-</sup> | 5 | 44.03 ± 1.9              | 19.57 ± 2.1              | 3 |
| 22022 | 43.28 ± 2.6              | 16.5 ± 1.4 <sup>-</sup>  | 3 | 43.41 ± 1.7              | 17.65 ± 0.8 <sup>-</sup> | 8 | 43.39 ± 1.4              | 16.3 ± 0.6 <sup>-</sup>  | 5 | nd                       | nd                       |   | nd                       | nd                       |   |
| 22073 | 43.88 ± 3.5 <sup>-</sup> | 17.94 ± 3.2              | 2 | 46.3 ± 0.8               | 16.73 ± 1.5 <sup>-</sup> | 2 | 44.20                    | 16.55                    | 1 | nd                       | nd                       |   | nd                       | nd                       |   |
| 22080 | 38.19 ± 1.4 <sup>-</sup> | 21.91 ± 1                | 5 | 41.83 ± 3.2              | 20.27 ± 2.3              | 7 | 40.77 ± 1.2 <sup>-</sup> | 19.89 ± 0.7              | 5 | nd                       | nd                       |   | nd                       | nd                       |   |
| 22081 | 51.15 ± 2.3 <sup>-</sup> | 15.01 ± 2.1 <sup>-</sup> | 5 | 51.38 ± 2.7 <sup>-</sup> | 14.72 ± 1.4 <sup>-</sup> | 8 | 53.3 ± 4.2 <sup>-</sup>  | 12.46 ± 2.7 <sup>-</sup> | 5 | 52.17 ± 1.3 <sup>-</sup> | 11.67 ± 0.7 <sup>-</sup> | 5 | 57.24 ± 5.6 <sup>-</sup> | 14.98 ± 0.3 <sup>-</sup> | 3 |
| 22083 | 44.1 ± 2.7 <sup>-</sup>  | 18.23 ± 1 <sup>-</sup>   | 5 | 48.43 ± 3.1 <sup>-</sup> | 16.89 ± 1.1 <sup>-</sup> | 8 | 46.48 ± 1.2 <sup>-</sup> | 16.96 ± 0.5 <sup>-</sup> | 5 | 45.13 ± 2.4 <sup>-</sup> | 15.23 ± 1.9 <sup>-</sup> | 5 | 45.57 ± 1.5 <sup>-</sup> | 18.3 ± 1 <sup>-</sup>    | 3 |
| 22094 | nd                       | nd                       | 0 | 44.64 ± 2.3              | 18.17 ± 2.2              | 5 | 47.31 ± 1.7 <sup>-</sup> | 15.18 ± 1.6 <sup>-</sup> | 5 | 46.27 ± 2 <sup>-</sup>   | 11.58 ± 2 <sup>-</sup>   | 5 | 47.72 ± 2.8              | 19.14 ± 1 <sup>-</sup>   | 3 |
| 22102 | nd                       | nd                       | 0 | 50.14 ± 0.9 <sup>-</sup> | 13.74 ± 1 <sup>-</sup>   | 7 | 47.77 ± 1.1 <sup>-</sup> | 12.84 ± 2 <sup>-</sup>   | 5 | 46.97 ± 1.9 <sup>-</sup> | 12.66 ± 1.4 <sup>-</sup> | 5 | 49.77 ± 5.6 <sup>-</sup> | 16.85 ± 3 <sup>-</sup>   | 3 |
| 22143 | nd                       | nd                       | 0 | 44.89 ± 2.7 <sup>-</sup> | 19.09 ± 0.7 <sup>-</sup> | 8 | 45.05 ± 2.1              | 18.76 ± 1                | 5 | 45.79 ± 1.6              | 17.44 ± 0.7 <sup>-</sup> | 5 | 45.47 ± 2.5              | 18.94 ± 1.2              | 3 |
| 22166 | 45.76 ± 2.8              | 16.79 ± 1.8              | 5 | 46.85 ± 2.5 <sup>-</sup> | 17.16 ± 1.6 <sup>-</sup> | 8 | 46.74 ± 0.8 <sup>-</sup> | 16.76 ± 0.6 <sup>-</sup> | 5 | 42.91 ± 2.3              | 16.19 ± 1.2 <sup>-</sup> | 5 | 47.95 ± 1.8              | 17.29 ± 1.1 <sup>-</sup> | 3 |
| 22174 | 46.15 ± 2.4 <sup>-</sup> | 18.62 ± 1.5 <sup>-</sup> | 5 | 46.53 ± 2.2 <sup>-</sup> | 17.24 ± 1.9 <sup>-</sup> | 8 | 48.44 ± 0.9 <sup>-</sup> | 16.37 ± 0.8 <sup>-</sup> | 5 | 46.13 ± 2.3              | 16.98 ± 1.9              | 5 | 46.58 ± 2.1 <sup>-</sup> | 16.68 ± 0.8 <sup>-</sup> | 3 |
| 22187 | 51.99 ± 1.7 <sup>-</sup> | 15.88 ± 0.9              | 5 | 52.8 ± 1.4 <sup>-</sup>  | 15.31 ± 1 <sup>-</sup>   | 8 | 51.69                    | 15.99                    | 2 | 50.14 ± 1.5 <sup>-</sup> | 14.37 ± 1.5 <sup>-</sup> | 5 | 53.22 ± 0.4 <sup>-</sup> | 16.5 ± 1.2 <sup>-</sup>  | 3 |

|       |                          |                          |   |                          |                          |    |                          |                          |    |                          |                          |   |                          |                          |    |
|-------|--------------------------|--------------------------|---|--------------------------|--------------------------|----|--------------------------|--------------------------|----|--------------------------|--------------------------|---|--------------------------|--------------------------|----|
| 22189 | 45.4 ± 2.7 <sup>-</sup>  | 17.88 ± 1.3 <sup>-</sup> | 5 | 51.18 ± 1.7 <sup>-</sup> | 14.92 ± 0.6 <sup>-</sup> | 8  | 52.13 ± 1.5 <sup>-</sup> | 14.22 ± 0.7 <sup>-</sup> | 5  | 44.94 ± 2.2              | 16.69 ± 1.1 <sup>-</sup> | 5 | 43.67 ± 2.5              | 19.11 ± 1 <sup>-</sup>   | 3  |
| 22226 | 41.69 ± 1.3              | 14.88 ± 0.8 <sup>-</sup> | 5 | 43.71 ± 1.2              | 16.04 ± 1.3 <sup>-</sup> | 8  | 42.36 ± 1.4              | 15.5 ± 0.8 <sup>-</sup>  | 5  | nd                       | nd                       |   | nd                       | nd                       |    |
| 22291 | 47.16 ± 3 <sup>-</sup>   | 16.35 ± 1.4 <sup>-</sup> | 5 | 48.38 ± 3.8 <sup>-</sup> | 16.71 ± 2 <sup>-</sup>   | 5  | 45.6 ± 1.9 <sup>-</sup>  | 17.31 ± 1.9 <sup>-</sup> | 5  | 44.47 ± 3.2              | 15.94 ± 1.5 <sup>-</sup> | 5 | 48.28 ± 2.7 <sup>-</sup> | 18.36 ± 1.3 <sup>-</sup> | 3  |
| 22332 | 48.54 ± 1.2              | 15.8 ± 1.2 <sup>-</sup>  | 2 | 43.12 ± 1                | 19.01 ± 0.9              | 3  | 42.87 ± 0.5              | 19.81 ± 0.9              | 5  | 41.3 ± 2.6               | 17.37 ± 1.3 <sup>-</sup> | 5 | nd                       | nd                       |    |
| 22351 | 44.09 ± 1.3 <sup>-</sup> | 19.92 ± 1.1              | 5 | 44.85 ± 2.9              | 18.72 ± 1.2 <sup>-</sup> | 8  | 43.89 ± 1.7              | 19.21 ± 0.9              | 5  | nd                       | nd                       |   | nd                       | nd                       |    |
| 22426 | 47.06 ± 1.6 <sup>-</sup> | 18.48 ± 1.1 <sup>-</sup> | 5 | 47.4 ± 3.7 <sup>-</sup>  | 18.01 ± 2.8              | 5  | 46.86 ± 3.1 <sup>-</sup> | 18.16 ± 1.3 <sup>-</sup> | 5  | 45.6 ± 2.5 <sup>-</sup>  | 17.25 ± 0.9              | 4 | 44.5 ± 1.5               | 20.62 ± 0.9              | 3  |
| 22492 | 46.27 ± 2.8 <sup>-</sup> | 15.4 ± 1.4 <sup>-</sup>  | 5 | 43.38 ± 1.7              | 17.44 ± 1.5 <sup>-</sup> | 8  | 43.67 ± 1.5              | 15.36 ± 0.4 <sup>-</sup> | 5  | 45.86 ± 1.1 <sup>-</sup> | 12.56 ± 1.1 <sup>-</sup> | 5 | 43.18 ± 1.4              | 17.24 ± 4                | 3  |
| 22510 | 46.37 ± 1.9 <sup>-</sup> | 16.46 ± 1.4 <sup>-</sup> | 5 | 43.53 ± 1.4              | 18.02 ± 0.8 <sup>-</sup> | 7  | 43.08 ± 1.2              | 17.28 ± 1 <sup>-</sup>   | 5  | 39.29 ± 2.9              | 16.2 ± 1.6 <sup>-</sup>  | 5 | nd                       | nd                       |    |
| 22705 | nd                       | nd                       | 0 | 43.35 ± 3.8              | 19 ± 2.2 <sup>-</sup>    | 8  | 44.38 ± 1                | 17.62 ± 1 <sup>-</sup>   | 5  | 42.7 ± 0.8               | 15.58 ± 1.2 <sup>-</sup> | 5 | nd                       | nd                       |    |
| 22811 | 48.92 ± 2.7 <sup>-</sup> | 15.47 ± 1.5 <sup>-</sup> | 5 | 46.75 ± 2.3              | 17.38 ± 2.5              | 2  | 43.43 ± 1.1              | 18.07 ± 0.2 <sup>-</sup> | 5  | nd                       | nd                       |   | nd                       | nd                       |    |
| 22852 | 45.12 ± 3.5              | 17.45 ± 1.4              | 5 | 49.46 ± 2.3 <sup>-</sup> | 15.92 ± 1.1 <sup>-</sup> | 8  | 40.44 ± 4.7 <sup>-</sup> | 18.58 ± 2.1              | 5  | nd                       | nd                       |   | nd                       | nd                       |    |
| 22888 | 44.96 ± 0.2 <sup>-</sup> | 17.76 ± 0.2 <sup>-</sup> | 2 | 43.53 ± 2.2              | 19.42 ± 0.8 <sup>-</sup> | 8  | 44.55 ± 0.8              | 19.26 ± 0.5              | 5  | 48.21                    | 14.82                    | 2 | 45.31 ± 2.5 <sup>-</sup> | 20.39 ± 1.6              | 3  |
| CL0J  | nd                       | nd                       | 0 | 43.05 ± 1.3              | 19.33 ± 1.2              | 5  | 41.42 ± 1.4              | 19.1 ± 0.5               | 8  | 41.36 ± 1.5              | 18.17 ± 0.8              | 5 | 41.12 ± 1                | 20.29 ± 0.6              | 6  |
| DBK   | 52.3 ± 0.9 <sup>-</sup>  | 15.05 ± 0.3 <sup>-</sup> | 4 | 52.91 ± 1.4 <sup>-</sup> | 14.48 ± 1.1 <sup>-</sup> | 16 | 52.26 ± 1.1 <sup>-</sup> | 14.16 ± 1 <sup>-</sup>   | 5  | 50.41 ± 1 <sup>-</sup>   | 13.25 ± 0.7 <sup>-</sup> | 4 | 54.81 ± 2.2 <sup>-</sup> | 12.37 ± 1.5 <sup>-</sup> | 7  |
| Kinb. | 48.37 ± 1 <sup>-</sup>   | 17.02 ± 0.7 <sup>-</sup> | 4 | 50.62 ± 1.7 <sup>-</sup> | 15.21 ± 1.2 <sup>-</sup> | 8  | 49.32 ± 0.9 <sup>-</sup> | 14.59 ± 0.6 <sup>-</sup> | 6  | 49.93 ± 1.2 <sup>-</sup> | 13.81 ± 0.9 <sup>-</sup> | 5 | 49.69 ± 2.7 <sup>-</sup> | 16.7 ± 1.3               | 10 |
| LG04  | nd                       | nd                       | 0 | 42.21 ± 1.6 <sup>-</sup> | 18.92 ± 0.8              | 10 | 40.9 ± 1.2 <sup>-</sup>  | 18.38 ± 0.7 <sup>-</sup> | 16 | 39.31 ± 2.4              | 17.71 ± 1.1 <sup>-</sup> | 5 | 41.13 ± 1.7              | 18.93 ± 0.6 <sup>-</sup> | 6  |
| W82   | 40.32 ± 0.9              | 20.66 ± 0.5              | 4 | 42.36 ± 1.7              | 20.8 ± 1.1               | 10 | 42.85 ± 1.2              | 19.49 ± 1.2              | 15 | 41.61 ± 2.1              | 18.92 ± 0.9              | 8 | 41.97 ± 2.4              | 21.03 ± 1 <sup>-</sup>   | 5  |

nd – not determined

Average and standard deviation for protein and oil levels (dry weight basis) for bulk seed samples from individual plants of mutant lines over 5 seasons. \*\* - significantly different from the control (by two-tailed type-2 t-test at  $p < 0.001$ , \* significantly different from the control at  $p < 0.05$ . Red color indicates mutant was replaced by backcross progeny after backcrossing.
